# Supplementary material for: Electrochemical copolymerization of 3,4-ethylenedioxythiophene and dithienothiophene: influence of feed ratio on electrical, optical and electrochromic properties
Source: Royal Society of Chemistry journal article supplement (doi:10.1039/d3ra08729h), 2024-01-01
Supplement: d3ra08729h1.pdf [file d3ra08729h1.pdf]

## Supporting Information

### Electrochemical copolymerization of 3,4-ethylenedioxythiophene and dithienothiophene: influence of feed ratio on electrical, optical and electrochromic properties

Rashi Kedia,<sup>ab</sup> Manisha Khatak,<sup>ab</sup> Manisha Balkhandia<sup>ab</sup> and Asit Patra<sup>\*ab</sup>

<sup>a</sup>Photovoltaic Metrology Section, Advanced Materials & Device Metrology Division, CSIR-National Physical Laboratory, Dr K. S. Krishnan Marg, New Delhi-110012, India

<sup>b</sup>Academy of Scientific and Innovative Research (AcSIR), Ghaziabad-201002, India

\*Corresponding Author: [apatra@nplindia.org](mailto:apatra@nplindia.org)

**Table S1.** Molar feed ratio of EDOT and DTT used to prepare different copolymers.

| Copolymers<br>P[EDOT- <i>co</i> -DTT] | Monomers feed ratio in the copolymerization<br>mixture |     |
|---------------------------------------|--------------------------------------------------------|-----|
|                                       | EDOT                                                   | DTT |
| P1(2:1)                               | 2                                                      | 1   |
| P2(1:1)                               | 1                                                      | 1   |
| P3(1:2)                               | 1                                                      | 2   |

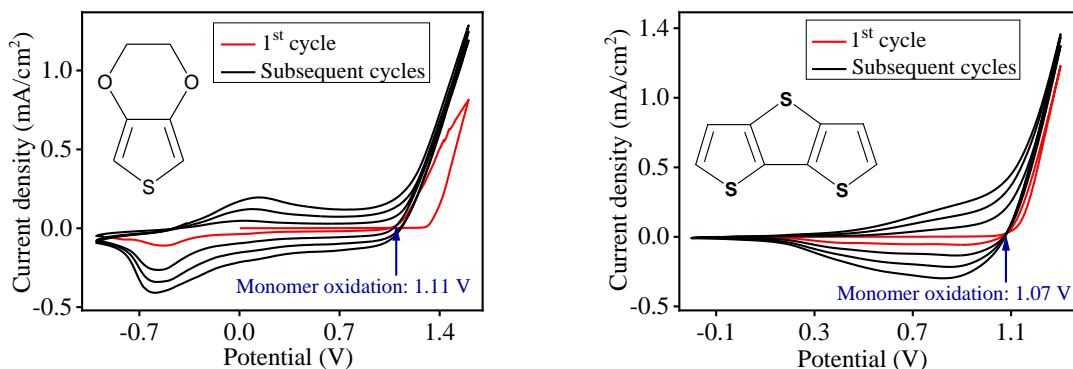

**Figure S1.** Electrochemical polymerization curves of EDOT and DTT in 0.1 M TBAClO<sub>4</sub>/MeCN solution to electrodeposit homopolymers PEDOT and PDTT at scan rate of 100 mV/s (vs Ag/Ag<sup>+</sup> wire, Fc/Fc<sup>+</sup> = 0.40 V).

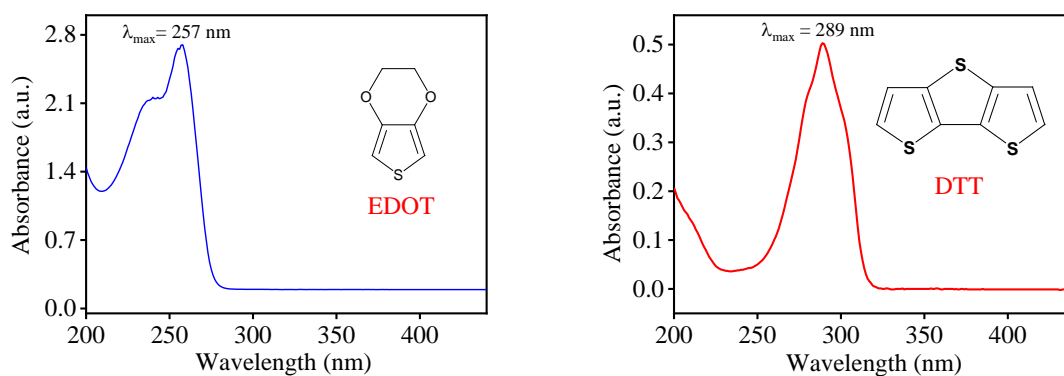

**Figure S2.** UV-visible absorption spectra of EDOT and DTT in acetonitrile solution.

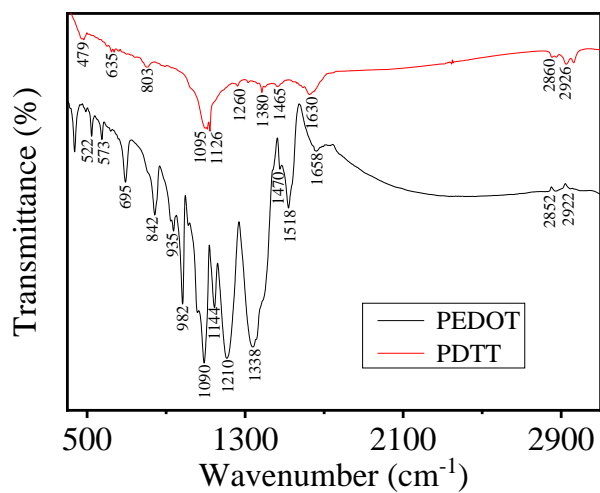

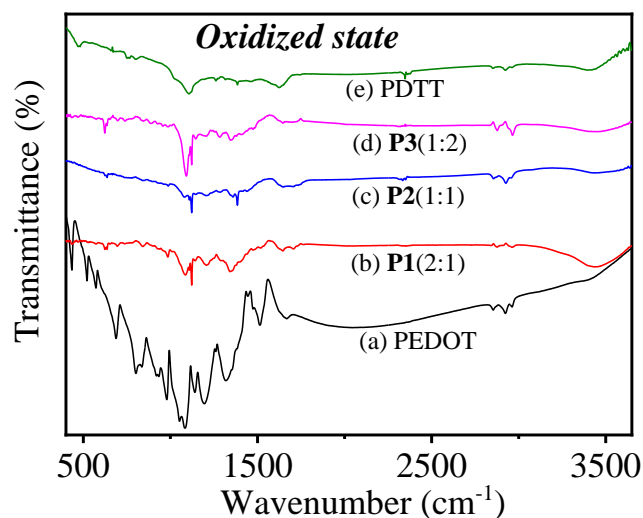

**Figure S3.** (i) FTIR spectra of PEDOT and PDTT. (ii) FTIR spectra of (a) PEDOT, (b) **P1(2:1)**, (c) **P2(1:1)**, (d) **P3(1:2)** and (e) PDTT in the oxidized form.

**Table S2.** Elemental analysis results: EDX spectrum and quantitative analysis of elemental composition of P[EDOT-*co*-DTT] copolymers obtained from various feed ratios of EDOT and DTT.

| Copolymer      | Neutral state                                                                                                                                                                                                                                                                                                                                                                | Oxidized state |         |         |     |       |       |     |       |       |     |       |       |              |               |               |                                                                                                                                                                                                                                                                                                                                                                              |         |         |         |     |       |       |     |       |       |     |       |       |              |               |               |
|----------------|------------------------------------------------------------------------------------------------------------------------------------------------------------------------------------------------------------------------------------------------------------------------------------------------------------------------------------------------------------------------------|----------------|---------|---------|-----|-------|-------|-----|-------|-------|-----|-------|-------|--------------|---------------|---------------|------------------------------------------------------------------------------------------------------------------------------------------------------------------------------------------------------------------------------------------------------------------------------------------------------------------------------------------------------------------------------|---------|---------|---------|-----|-------|-------|-----|-------|-------|-----|-------|-------|--------------|---------------|---------------|
| <b>P1(2:1)</b> | <table border="1"> <thead> <tr> <th>Element</th> <th>Weight%</th> <th>Atomic%</th> </tr> </thead> <tbody> <tr> <td>C K</td> <td>61.13</td> <td>73.74</td> </tr> <tr> <td>O K</td> <td>19.16</td> <td>17.35</td> </tr> <tr> <td>S K</td> <td>19.71</td> <td>8.91</td> </tr> <tr> <td><b>Total</b></td> <td><b>100.00</b></td> <td><b>100.00</b></td> </tr> </tbody> </table>  | Element        | Weight% | Atomic% | C K | 61.13 | 73.74 | O K | 19.16 | 17.35 | S K | 19.71 | 8.91  | <b>Total</b> | <b>100.00</b> | <b>100.00</b> | <table border="1"> <thead> <tr> <th>Element</th> <th>Weight%</th> <th>Atomic%</th> </tr> </thead> <tbody> <tr> <td>C K</td> <td>51.68</td> <td>65.38</td> </tr> <tr> <td>O K</td> <td>24.65</td> <td>23.41</td> </tr> <tr> <td>S K</td> <td>23.67</td> <td>11.21</td> </tr> <tr> <td><b>Total</b></td> <td><b>100.00</b></td> <td><b>100.00</b></td> </tr> </tbody> </table> | Element | Weight% | Atomic% | C K | 51.68 | 65.38 | O K | 24.65 | 23.41 | S K | 23.67 | 11.21 | <b>Total</b> | <b>100.00</b> | <b>100.00</b> |
| Element        | Weight%                                                                                                                                                                                                                                                                                                                                                                      | Atomic%        |         |         |     |       |       |     |       |       |     |       |       |              |               |               |                                                                                                                                                                                                                                                                                                                                                                              |         |         |         |     |       |       |     |       |       |     |       |       |              |               |               |
| C K            | 61.13                                                                                                                                                                                                                                                                                                                                                                        | 73.74          |         |         |     |       |       |     |       |       |     |       |       |              |               |               |                                                                                                                                                                                                                                                                                                                                                                              |         |         |         |     |       |       |     |       |       |     |       |       |              |               |               |
| O K            | 19.16                                                                                                                                                                                                                                                                                                                                                                        | 17.35          |         |         |     |       |       |     |       |       |     |       |       |              |               |               |                                                                                                                                                                                                                                                                                                                                                                              |         |         |         |     |       |       |     |       |       |     |       |       |              |               |               |
| S K            | 19.71                                                                                                                                                                                                                                                                                                                                                                        | 8.91           |         |         |     |       |       |     |       |       |     |       |       |              |               |               |                                                                                                                                                                                                                                                                                                                                                                              |         |         |         |     |       |       |     |       |       |     |       |       |              |               |               |
| <b>Total</b>   | <b>100.00</b>                                                                                                                                                                                                                                                                                                                                                                | <b>100.00</b>  |         |         |     |       |       |     |       |       |     |       |       |              |               |               |                                                                                                                                                                                                                                                                                                                                                                              |         |         |         |     |       |       |     |       |       |     |       |       |              |               |               |
| Element        | Weight%                                                                                                                                                                                                                                                                                                                                                                      | Atomic%        |         |         |     |       |       |     |       |       |     |       |       |              |               |               |                                                                                                                                                                                                                                                                                                                                                                              |         |         |         |     |       |       |     |       |       |     |       |       |              |               |               |
| C K            | 51.68                                                                                                                                                                                                                                                                                                                                                                        | 65.38          |         |         |     |       |       |     |       |       |     |       |       |              |               |               |                                                                                                                                                                                                                                                                                                                                                                              |         |         |         |     |       |       |     |       |       |     |       |       |              |               |               |
| O K            | 24.65                                                                                                                                                                                                                                                                                                                                                                        | 23.41          |         |         |     |       |       |     |       |       |     |       |       |              |               |               |                                                                                                                                                                                                                                                                                                                                                                              |         |         |         |     |       |       |     |       |       |     |       |       |              |               |               |
| S K            | 23.67                                                                                                                                                                                                                                                                                                                                                                        | 11.21          |         |         |     |       |       |     |       |       |     |       |       |              |               |               |                                                                                                                                                                                                                                                                                                                                                                              |         |         |         |     |       |       |     |       |       |     |       |       |              |               |               |
| <b>Total</b>   | <b>100.00</b>                                                                                                                                                                                                                                                                                                                                                                | <b>100.00</b>  |         |         |     |       |       |     |       |       |     |       |       |              |               |               |                                                                                                                                                                                                                                                                                                                                                                              |         |         |         |     |       |       |     |       |       |     |       |       |              |               |               |
| <b>P2(1:1)</b> | <table border="1"> <thead> <tr> <th>Element</th> <th>Weight%</th> <th>Atomic%</th> </tr> </thead> <tbody> <tr> <td>C K</td> <td>58.76</td> <td>72.79</td> </tr> <tr> <td>O K</td> <td>17.32</td> <td>16.11</td> </tr> <tr> <td>S K</td> <td>23.93</td> <td>11.10</td> </tr> <tr> <td><b>Total</b></td> <td><b>100.00</b></td> <td><b>100.00</b></td> </tr> </tbody> </table> | Element        | Weight% | Atomic% | C K | 58.76 | 72.79 | O K | 17.32 | 16.11 | S K | 23.93 | 11.10 | <b>Total</b> | <b>100.00</b> | <b>100.00</b> | <table border="1"> <thead> <tr> <th>Element</th> <th>Weight%</th> <th>Atomic%</th> </tr> </thead> <tbody> <tr> <td>C K</td> <td>61.58</td> <td>74.26</td> </tr> <tr> <td>O K</td> <td>18.48</td> <td>16.73</td> </tr> <tr> <td>S K</td> <td>19.94</td> <td>9.01</td> </tr> <tr> <td><b>Total</b></td> <td><b>100.00</b></td> <td><b>100.00</b></td> </tr> </tbody> </table>  | Element | Weight% | Atomic% | C K | 61.58 | 74.26 | O K | 18.48 | 16.73 | S K | 19.94 | 9.01  | <b>Total</b> | <b>100.00</b> | <b>100.00</b> |
| Element        | Weight%                                                                                                                                                                                                                                                                                                                                                                      | Atomic%        |         |         |     |       |       |     |       |       |     |       |       |              |               |               |                                                                                                                                                                                                                                                                                                                                                                              |         |         |         |     |       |       |     |       |       |     |       |       |              |               |               |
| C K            | 58.76                                                                                                                                                                                                                                                                                                                                                                        | 72.79          |         |         |     |       |       |     |       |       |     |       |       |              |               |               |                                                                                                                                                                                                                                                                                                                                                                              |         |         |         |     |       |       |     |       |       |     |       |       |              |               |               |
| O K            | 17.32                                                                                                                                                                                                                                                                                                                                                                        | 16.11          |         |         |     |       |       |     |       |       |     |       |       |              |               |               |                                                                                                                                                                                                                                                                                                                                                                              |         |         |         |     |       |       |     |       |       |     |       |       |              |               |               |
| S K            | 23.93                                                                                                                                                                                                                                                                                                                                                                        | 11.10          |         |         |     |       |       |     |       |       |     |       |       |              |               |               |                                                                                                                                                                                                                                                                                                                                                                              |         |         |         |     |       |       |     |       |       |     |       |       |              |               |               |
| <b>Total</b>   | <b>100.00</b>                                                                                                                                                                                                                                                                                                                                                                | <b>100.00</b>  |         |         |     |       |       |     |       |       |     |       |       |              |               |               |                                                                                                                                                                                                                                                                                                                                                                              |         |         |         |     |       |       |     |       |       |     |       |       |              |               |               |
| Element        | Weight%                                                                                                                                                                                                                                                                                                                                                                      | Atomic%        |         |         |     |       |       |     |       |       |     |       |       |              |               |               |                                                                                                                                                                                                                                                                                                                                                                              |         |         |         |     |       |       |     |       |       |     |       |       |              |               |               |
| C K            | 61.58                                                                                                                                                                                                                                                                                                                                                                        | 74.26          |         |         |     |       |       |     |       |       |     |       |       |              |               |               |                                                                                                                                                                                                                                                                                                                                                                              |         |         |         |     |       |       |     |       |       |     |       |       |              |               |               |
| O K            | 18.48                                                                                                                                                                                                                                                                                                                                                                        | 16.73          |         |         |     |       |       |     |       |       |     |       |       |              |               |               |                                                                                                                                                                                                                                                                                                                                                                              |         |         |         |     |       |       |     |       |       |     |       |       |              |               |               |
| S K            | 19.94                                                                                                                                                                                                                                                                                                                                                                        | 9.01           |         |         |     |       |       |     |       |       |     |       |       |              |               |               |                                                                                                                                                                                                                                                                                                                                                                              |         |         |         |     |       |       |     |       |       |     |       |       |              |               |               |
| <b>Total</b>   | <b>100.00</b>                                                                                                                                                                                                                                                                                                                                                                | <b>100.00</b>  |         |         |     |       |       |     |       |       |     |       |       |              |               |               |                                                                                                                                                                                                                                                                                                                                                                              |         |         |         |     |       |       |     |       |       |     |       |       |              |               |               |

P3(1:2)

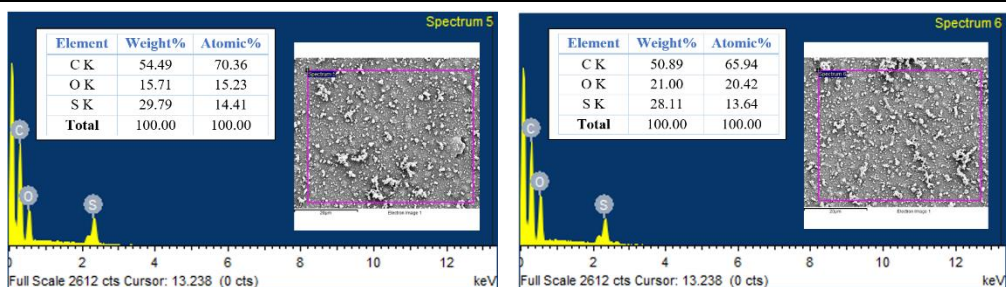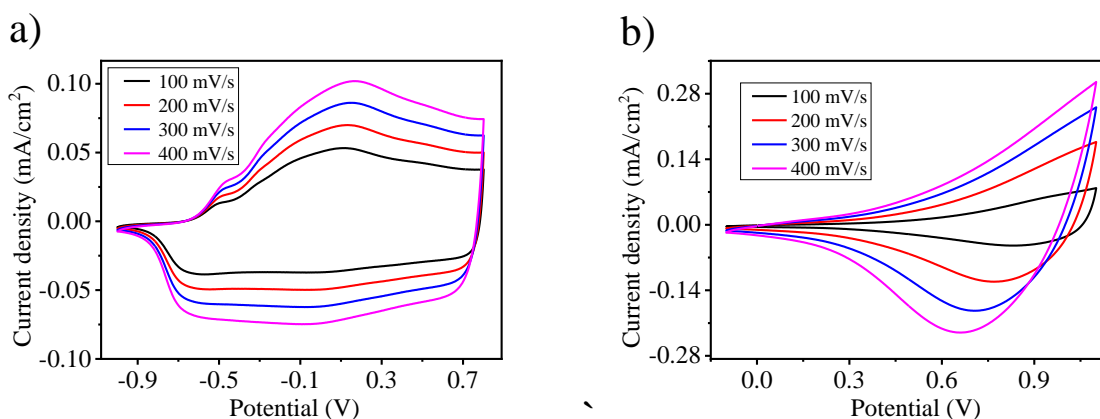

**Figure S4.** CV curves of PEDOT and PDTT on Pt working electrode in monomer-free electrolytic solution (0.1 M TBAClO<sub>4</sub>/MeCN) at potential scan rate of 100, 200, 300 and 400 mV/s (vs Ag/Ag<sup>+</sup>).

**Table S3.** Photographs of copolymers electrodeposited onto ITO electrode in various feed ratio of EDOT and DTT as 2:1, 1:1 and 1:2. Neutral form denotes the undoped form of the copolymers while oxidized form shows the doped condition.

| Copolymers | Colour of copolymers |          |
|------------|----------------------|----------|
|            | Neutral              | Oxidized |
| P1(2:1)    |                      |          |

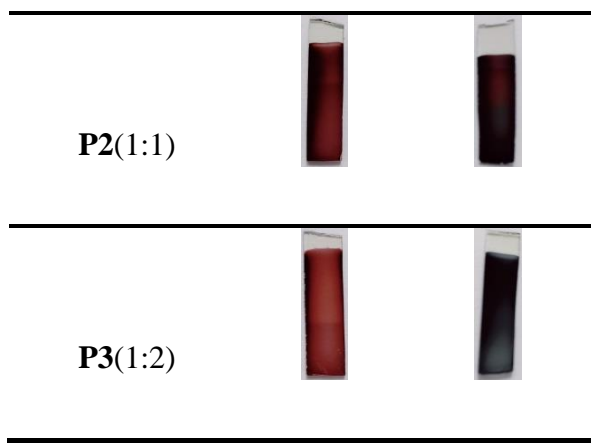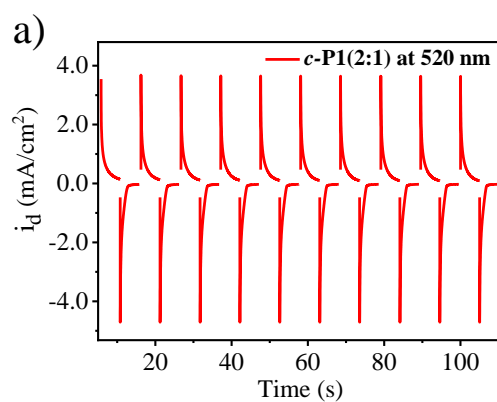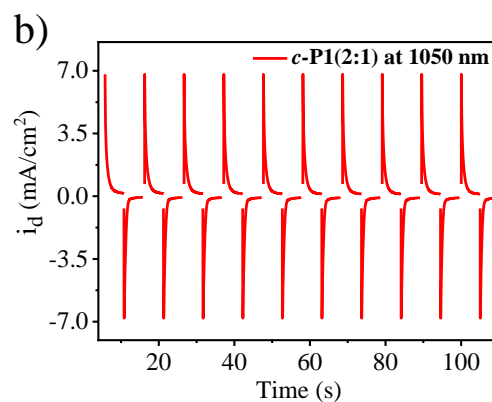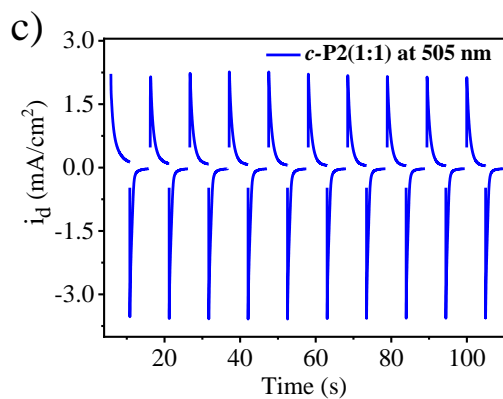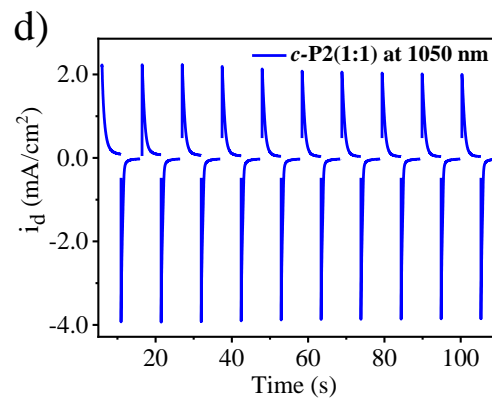

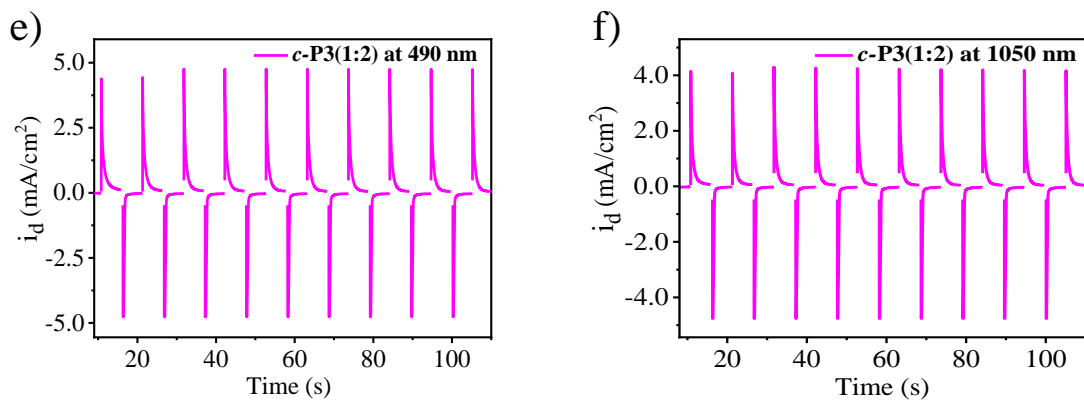

**Figure S5.** Chronoamperograms showing current consumption during the electrochromic switching of P[EDOT-*co*-DTT] in 0.1 M MeCN/TBAClO<sub>4</sub> electrolyte solution at different wavelengths with the switching time of 5 s.

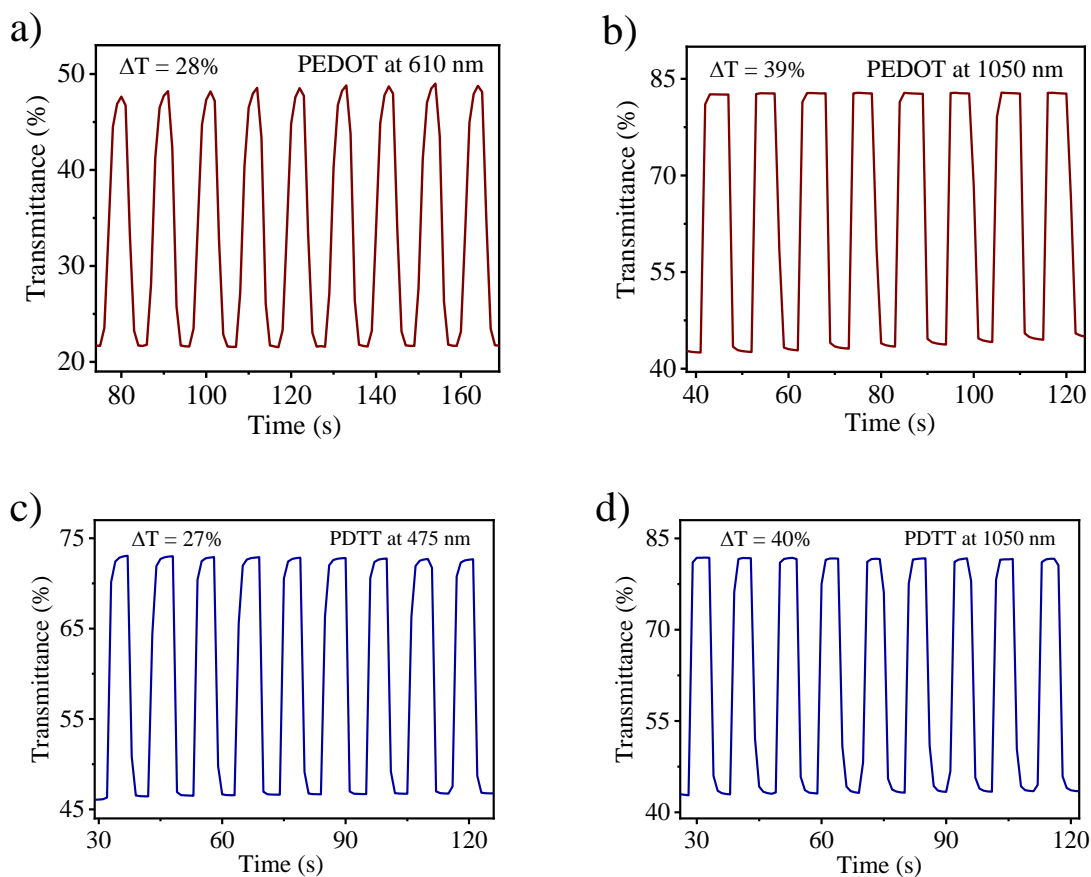

**Figure S6.** Optical response of the homopolymers a-b) PEDOT and c-d) PDTT in the potential between -1.0 and 1.0 V at  $\lambda_{\max}$  and 1050 nm at the switching time of 5 s.
